# Supplementary material
Source: PubMed Central journal article supplement (PMC2849234)
Supplement: supp_76_7_2067__1.pdf [file supp_76_7_2067__1.pdf]

## Supporting Information

### Genetic Characterization of the Monodictyphenone Gene Cluster in *Aspergillus nidulans*

Yi-Ming Chiang<sup>1,2</sup>, Edyta Szewczyk<sup>3,8</sup>, Ashley D. Davidson<sup>3</sup>, Ruth Entwistle<sup>4</sup>, Nancy P. Keller<sup>5,6</sup>,  
Clay C. C. Wang<sup>2,7</sup> & Berl R. Oakley<sup>3,4</sup>

<sup>1</sup>Graduate Institute of Pharmaceutical Science, Chia Nan University of Pharmacy and Science, Tainan 71710, Taiwan, ROC.

<sup>2</sup>Department of Pharmacology and Pharmaceutical Sciences, University of Southern California, School of Pharmacy, 1985 Zonal Avenue, Los Angeles, California 90089, USA.

<sup>3</sup>Department of Molecular Genetics, Ohio State University, 484 West 12th Avenue, Columbus, Ohio 43210, USA.

<sup>4</sup>Department of Molecular Biosciences, University of Kansas, 1200 Sunnyside Ave., Lawrence, KS 66045, USA.

<sup>5</sup>Department of Medical Microbiology and Immunology, University of Wisconsin-Madison, Madison, WI 53706, USA.

<sup>6</sup>Department of Bacteriology, University of Wisconsin-Madison, Madison, WI 53706, USA.

<sup>7</sup>Department of Chemistry, University of Southern California, College of Letters, Arts, and Sciences, Los Angeles, California 90089, USA.

<sup>8</sup>Current address, Research Center for Infectious Diseases, Röntgenring 11, D-97070, Würzburg, Germany.

Correspondence should be addressed to C.W. ([clayw@usc.edu](mailto:clayw@usc.edu)) and B.O. ([boakley@ku.edu](mailto:boakley@ku.edu))

## Table of Contents

|                                                                                                                        |     |
|------------------------------------------------------------------------------------------------------------------------|-----|
| <b>Table S1.</b> Primers used in this study.                                                                           | S3  |
| <b>Table S2.</b> <sup>1</sup> H and <sup>13</sup> C NMR data for endocrocin <b>9</b> .                                 | S5  |
| <b>Figure S1.</b> HPLC profiles of <i>nkuAΔ</i> , <i>stcJΔ</i> and <i>nkuAΔ</i> , <i>stcJΔ</i> , <i>cclAΔ</i> strains. | S6  |
| <b>Figure S2.</b> Diagnostic PCR strategy and results.                                                                 | S7  |
| <b>Figure S3.</b> UV-Vis and ESIMS spectra of compounds <b>1 – 10</b> .                                                | S11 |
| <b>Figure S4.</b> EIC profiles of mdp cluster gene deletants at <i>m/z</i> 287.                                        | S12 |
| <b>Figure S5.</b> Metabolite profiles of <i>cclAΔ</i> treated with GSH and PBN.                                        | S13 |
| <b>Figure S6.</b> HMBC correlations of endocrocin ( <b>9</b> ).                                                        | S14 |
| <b>Figure S7.</b> Possible pathway for conversion of versicolorin A to demethylsterigmatocystin.                       | S15 |
| <b>Figure S8.</b> <sup>1</sup> H NMR spectrum of endocrocin ( <b>9</b> ) in DMSO- <i>d</i> <sub>6</sub> .              | S16 |
| <b>Figure S9.</b> <sup>13</sup> C NMR spectrum of endocrocin ( <b>9</b> ) in DMSO- <i>d</i> <sub>6</sub> .             | S16 |
| <b>Figure S10.</b> <sup>1</sup> H NMR spectrum of endocrocin ( <b>9</b> ) in CD <sub>3</sub> OD.                       | S17 |
| <b>Figure S11.</b> <sup>13</sup> C NMR spectrum of endocrocin ( <b>9</b> ) in CD <sub>3</sub> OD.                      | S17 |

**Table S1.** Primers used in this study.

| primer      | Sequence (5'→3')                                                |
|-------------|-----------------------------------------------------------------|
| AN10039.4P1 | GTA CAA CAC CGG CCT CTA GC                                      |
| AN10039.4P2 | ACC ACA CCC ATA CGC ATA CC                                      |
| AN10039.4P3 | CGA AGA GGG TGA AGA GCA TTG GAC ATG ACG ACA TGA TAC GG          |
| AN10039.4P4 | GCA TCA GTG CCT CCT CTC AGA CAG CTG CGT GAC CTT TCT TTT CC      |
| AN10039.4P5 | TGG CAG CAT CTA AGG ATT GG                                      |
| AN10039.4P6 | GAA GCC ATC CCC ACT AAT CC                                      |
| AN10021.4P1 | GTC ACC GAC CTG AAG TAC CC                                      |
| AN10021.4P2 | TGT CTT GTG AGT TGG GAT CG                                      |
| AN10021.4P3 | CGA AGA GGG TGA AGA GCA TTG CAA CCG ATA GAG CCT GAA CC          |
| AN10021.4P4 | GCA TCA GTG CCT CCT CTC AGA CAG GGA TAC AGT TCC GAA CAA GC      |
| AN10021.4P5 | TGA GGG ACT GAG GGT CTT CC                                      |
| AN10021.4P6 | GAC ACC ATG AGG GAC TGA GG                                      |
| AN10049.4P1 | ACC TCA ATT CCA ACG TCA GC                                      |
| AN10049.4P2 | AAA GTT GCC CTT GTG ACT GG                                      |
| AN10049.4P3 | CGA AGA GGG TGA AGA GCA TTG AGT GTC TAG GAC GGG AAG ACC         |
| AN10049.4P4 | GCA TCA GTG CCT CCT CTC AGA CAG TAG TTT CTG CGT CGG AAT CG      |
| AN10049.4P5 | CCA GCC TCG ACA ACA GAT CC                                      |
| AN10049.4P6 | GGC GCT GAC CTA TAA TTT GG                                      |
| AN0146.4P1  | CGC ACA GCT TCA TTC CTA CC                                      |
| AN0146.4P2  | CAA CAT GCC TCC AAT TAG CC                                      |
| AN0146.4P3  | CGA AGA GGG TGA AGA GCA TTG TGG AGA CAT TGG TGC TTT CC          |
| AN0146.4P4  | GCA TCA GTG CCT CCT CTC AGA CAG GTA AAA CCC GCC TTC ATA CG      |
| AN0146.4P5  | ATT CCG ACG CAG AAA CTA CC                                      |
| AN0146.4P6  | ATA TGC AGC CGA ACA TGA CC                                      |
| AN0147.4P1  | TGT AAC CAG TGT TGG GAC ACC                                     |
| AN0147.4P2  | GAA AGT GGC AGT GCA AGT CC                                      |
| AN0147.4P3  | CGA AGA GGG TGA AGA GCA TTG TTG GGT AGG GTC ATT GAA GC          |
| AN0147.4P4  | GCA TCA GTG CCT CCT CTC AGA CAG CAG TCG CAA TGT GAT TGA GC      |
| AN0147.4P5  | CAA TAC CTC AAC CAG GAG TCG                                     |
| AN0147.4P6  | CAG TGT TGG AGG ACA TGA GG                                      |
| AN0148.4P1  | CGA GGC AAC AGA CAA ATT CC                                      |
| AN0148.4P2  | TAT ACC ACC CCG AAC TCT GC                                      |
| AN0148.4P3  | CGA AGA GGG TGA AGA GCA TTG ATC AAT CGG GGG ATT ACA GC          |
| AN0148.4P4  | GCA TCA GTG CCT CCT CTC AGA CAG GAG TGG TCG GAG TCT TTT TCC     |
| AN0148.4P5  | ATG GAC CTT TGC GTG TTT CC                                      |
| AN0148.4P6  | GAG CAT GCG GTA GAA TTT CC                                      |
| AN0149.4P1  | GGT TCT GCG AGA TCT CAT CC                                      |
| AN0149.4P2  | GCG AGA TCT CAT CCA CTA ACG                                     |
| AN0149.4P3  | CGA AGA GGG TGA AGA GCA TTG AGT CTA GCC GAT GCT TTT GC          |
| AN0149.4P4  | GCA TCA GTG CCT CCT CTC AGA CAG ATT GGA TGG AGT GAG GTT GG      |
| AN0149.4P5  | CCC ATT CGA CCG ATA ACT CC                                      |
| AN0149.4P6  | ACG GAG GAG AAG GAC TTT GC                                      |
| AN0150.4P1  | TGG TGT GAA TTC AGC TTT CG                                      |
| AN0150.4P2  | ACA TAT GGT CAT GCG AGT GC                                      |
| AN0150.4P3  | CGA AGA GGG TGA AGA GCA TTG AAG TGA CAA GCG TCA GAT CG          |
| AN0150.4P4  | GCA TCA GTG CCT CCT CTC AGA CAG CCC ATC CTC ACT CAT CAA CC      |
| AN0150.4P5  | TTG ACT GAA CCC TGC TAG GC                                      |
| AN0150.4P6  | TAC TGG AAG CGC TGA TAT GC                                      |
| AN10022.4P1 | AAC AAC CTC GTG GAC TAC GC                                      |
| AN10022.4P2 | CTG TCC ACG GAG AAG AGT GG                                      |
| AN10022.4P3 | CGA AGA GGG TGA AGA GCA TTG TGG TTG ATG AGT GAG GAT GG          |
| AN10022.4P4 | GCA TCA GTG CCT CCT CTC AGA CAG TAG AGT CGC TTC GGG ACA TCA ACC |
| AN10022.4P5 | TCC CAG CGA GCA GAA GAT AGA AG                                  |

|                  |                                                             |
|------------------|-------------------------------------------------------------|
| AN10022.4P6      | CTG GGA TTG GAG AAC GTA GC                                  |
| AN10035.4P1      | CAG CGA GAT CAA CCA TCA CC                                  |
| AN10035.4P2      | TTC TGC ATA TCA GCG CTT CC                                  |
| AN10035.4P3      | CGA AGA GGG TGA AGA GCA TTG GGG TTT CAG TGG AAC TGT CG      |
| AN10035.4P4      | GCA TCA GTG CCT CCT CTC AGA CAG AGA TGG ATT GTG TGC TGA GG  |
| AN10035.4P5      | GGA GTT CAT CGA GCG TAT CG                                  |
| AN10035.4P6      | CGG GTA CCG TAG CCT AAA CC                                  |
| AN10038.4P1      | TAC AAT CCC AGG CCA TTA GG                                  |
| AN10038.4P2      | GGA AGA AAT GCC TGA GCA AGC                                 |
| AN10038.4P3      | CGA AGA GGG TGA AGA GCA TTG CGA TAC GCT CGA TGA ACT CC      |
| AN10038.4P4      | GCA TCA GTG CCT CCT CTC AGA CAG TCG GTG GCG TTA AGA ATA GC  |
| AN10038.4P5      | GTA GTC ATG ACG GGG AAT GG                                  |
| AN10038.4P6      | CTC CAG ACA TGG AGG GAA GG                                  |
| AN10044.4P1      | TCC CGC AAC CTT CTT AAA CC                                  |
| AN10044.4P2      | CTC AAG GAC CCC ATC ATA CC                                  |
| AN10044.4P3      | CGA AGA GGG TGA AGA GCA TTG CGG GTA CCG TAG CCT AAA CC      |
| AN10044.4P4      | GCA TCA GTG CCT CCT CTC AGA CAG AGC CCT GAT CGA GGT TAA GG  |
| AN10044.4P5      | CAT CTC GGC AGT CTT TCT CG                                  |
| AN10044.4P6      | GCA CAG AGG TTT AGC ATC TCG                                 |
| AN10023.4P1      | TGA TCC AGA ATC TGC TCT CG                                  |
| AN10023.4P2      | CGC CTA CTG TCG AAA CAA GC                                  |
| AN10023.4P3      | CGA AGA GGG TGA AGA GCA TTG GGT AGA TGG TTG GGT TTT GC      |
| AN10023.4P4      | GCA TCA GTG CCT CCT CTC AGA CAG GGG TCT TGG CCA TCT AGT ACG |
| AN10023.4P5      | CTC GGT CTG ACC ATT CTT GC                                  |
| AN10023.4P6      | GTG TTT TGC TCT TGC ACA GG                                  |
| AN0153.4P1       | GAG AAA GAC TGC CGA GAT GC                                  |
| AN0153.4P2       | GCC GAG ATG CTA AAC CTC TG                                  |
| AN0153.4P3       | CGA AGA GGG TGA AGA GCA TTG ATG ATG CTT CCA GGA TCA GC      |
| AN0153.4P4       | GCA TCA GTG CCT CCT CTC AGA CAG CCG TCA GTC AGT CAA AGT GG  |
| AN0153.4P5       | CTG CCT CCT TTA CCC GTC TCC                                 |
| AN0153.4P6       | AGC CTT GCT GCC TCC TTT ACC                                 |
| alcA_AN10021.4P1 | GTC ACC GAC CTG AAG TAC CC                                  |
| alcA_AN10021.4P2 | TGT CTT GTG AGT TGG GAT CG                                  |
| alcA_AN10021.4P3 | CGA AGA GGG TGA AGA GCA TTG CAA CCG ATA GAG CCT GAA CC      |
| alcA_AN10021.4P4 | ATC CTA TCA CCT CGC CTC AAA ATG ATG TCT AGT CTA TCC GAC C   |
| alcA_AN10021.4P5 | GAA GGT CGT CGT GTT TGT GG                                  |
| alcA_AN10021.4P6 | GGT GTG GTT GTG GCT AGA GG                                  |

Blue and red sequences are tails that anneal to the *A. fumigatus pyroA* (*AfpyroA*) fragment during fusion PCR. Green sequence is a tail that anneals to the *alcA* promoter fragment during fusion PCR.

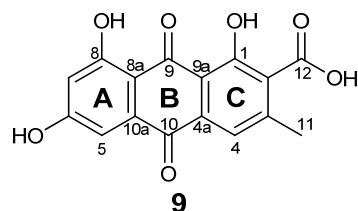

**Table S2.** NMR data for endocrocin **9** (400 and 100 MHz in DMSO-*d*<sub>6</sub> and CD<sub>3</sub>OD).

| position | DMSO- <i>d</i> <sub>6</sub> <sup>a</sup> | DMSO- <i>d</i> <sub>6</sub> <sup>b</sup> | DMSO- <i>d</i> <sub>6</sub> <sup>c</sup> | DMSO- <i>d</i> <sub>6</sub> |                                 | CD <sub>3</sub> OD |                                 |
|----------|------------------------------------------|------------------------------------------|------------------------------------------|-----------------------------|---------------------------------|--------------------|---------------------------------|
|          | δ <sub>C</sub>                           | δ <sub>C</sub>                           | δ <sub>C</sub>                           | δ <sub>C</sub>              | δ <sub>H</sub>                  | δ <sub>C</sub>     | δ <sub>H</sub>                  |
| 1        | 157.9                                    | 157.9                                    | 157.8                                    | no <sup>e</sup>             | —                               | 159.9              | —                               |
| 2        | 130.3                                    | 129.1                                    | 130.5                                    | 129.1                       | —                               | 132.2              | —                               |
| 3        | 143.6                                    | 144.0                                    | 143.6                                    | 145.4                       | —                               | 145.6              | —                               |
| 4        | 120.4                                    | 120.5                                    | 120.5                                    | 120.0                       | 7.41 (1H, s)                    | 122.1              | 7.58 (1H, s)                    |
| 4a       | 134.7 <sup>d</sup>                       | 130.5                                    | 135.1                                    | 135.0 <sup>d</sup>          | —                               | 136.9 <sup>d</sup> | —                               |
| 5        | 108.9                                    | 108.9                                    | 108.9                                    | 108.2                       | 7.09 (1H, d, <i>J</i> = 2.4 Hz) | 110.4              | 7.15 (1H, d, <i>J</i> = 2.4 Hz) |
| 6        | 165.7                                    | 165.7                                    | 165.7                                    | 165.0                       | —                               | 167.6              | —                               |
| 7        | 107.8                                    | 107.9                                    | 108.0                                    | 108.2                       | 6.59 (1H, d, <i>J</i> = 2.4 Hz) | 109.2              | 6.54 (1H, d, <i>J</i> = 2.4 Hz) |
| 8        | 164.5                                    | 164.5                                    | 164.5                                    | 164.3                       | —                               | 166.8              | —                               |
| 8a       | 108.8                                    | 109.1                                    | 109.1                                    | 109.7                       | —                               | 110.7              | —                               |
| 9        | 189.1                                    | no <sup>e</sup>                          | 167.0 <sup>f</sup>                       | 188.7                       | —                               | 191.8              | —                               |
| 9a       | 113.5                                    | 114.9                                    | 113.9                                    | 114.7                       | —                               | 115.4              | —                               |
| 10       | 180.5                                    | 181.8                                    | 181.1                                    | 181.9                       | —                               | 182.7              | —                               |
| 10a      | 132.2 <sup>d</sup>                       | no <sup>e</sup>                          | 132.5                                    | 133.1 <sup>d</sup>          | —                               | 134.5 <sup>d</sup> | —                               |
| 11       | 19.7                                     | 19.4                                     | 19.7                                     | 21.2                        | 2.48 (3H, s)                    | 20.4               | —                               |
| 12       | 167.0                                    | no <sup>e</sup>                          | 189.4 <sup>f</sup>                       | 168.1                       | —                               | 170.0              | —                               |
| OH       | —                                        | —                                        | —                                        | —                           | 12.59 (1H, s)                   | —                  | —                               |

<sup>a</sup>Data obtained from Kurobane et al., *J. Antibiot. (Tokyo)* **32**, 1256-1266 (1979). <sup>b</sup>Data obtained from Waser et al., *Tetrahedron Lett.* **46**, 2377-2380 (2005). <sup>c</sup>Data obtained from Awakawa et al., *Chem. Biol.* **16**, 613-623 (2009). <sup>d</sup>Values in the same column may be interchanged. <sup>e</sup>Not observed. <sup>f</sup>These two signals might be misassigned. Some differences in the δ<sub>C</sub> with reported literature values might be due to the C-1 hydroxy-assisted tautomerization of the carboxylic acid.

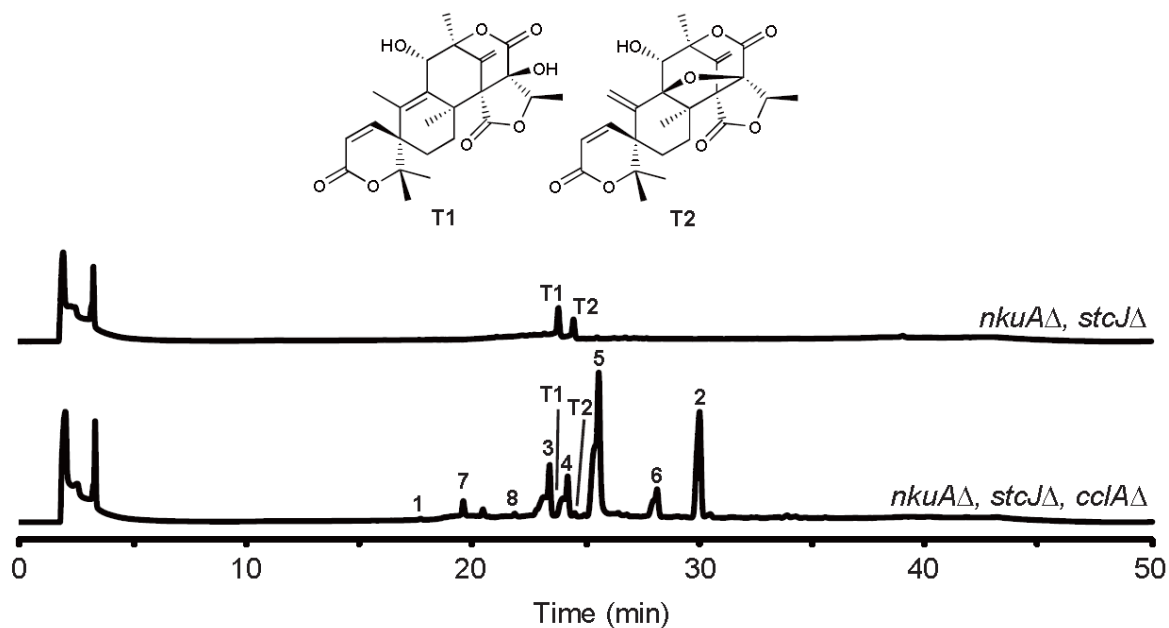

**Figure S1.** Total UV scan HPLC profiles of *A. nidulans nkuAΔ, stcJΔ* double knockout and *nkuAΔ, stcJΔ, cclAΔ* triple knockout strains. The *nkuAΔ, stcJΔ* double knockout strain produces mainly meroterpenoids (T1 and T2). The *nkuAΔ, stcJΔ, cclAΔ* triple knockout strain produces meroterpenoids as well as monodictyphenone (**1**), emodin (**2**), and emodin derivatives (**3 – 8**). The retention times of some compounds are shifted slightly when compared with **Figure 3**. This was due to the use of different batches of HPLC columns.

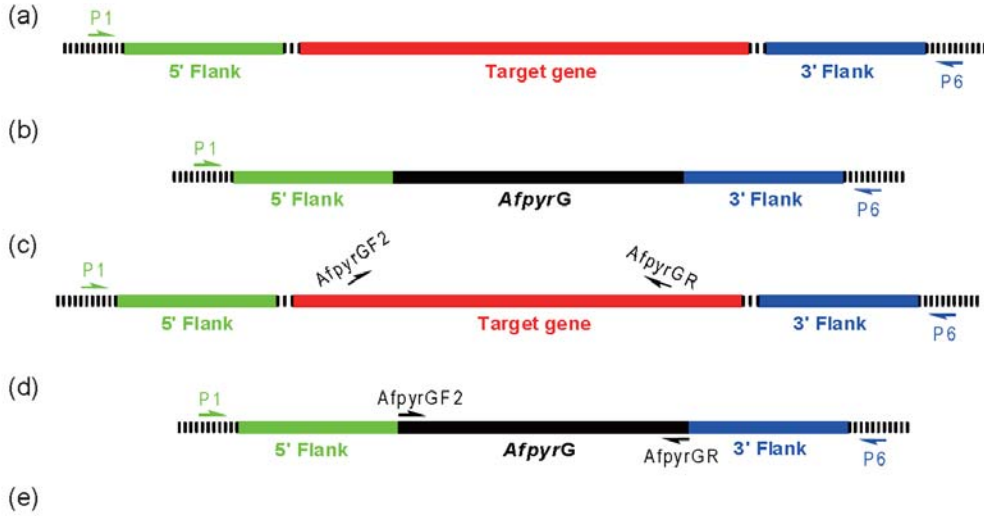

**AN10039.4**

wt = 4,013 bp    wt = no band    wt = no band  
 ko = 4,031 bp    ko = 2,983 bp    ko = 2,933 kb

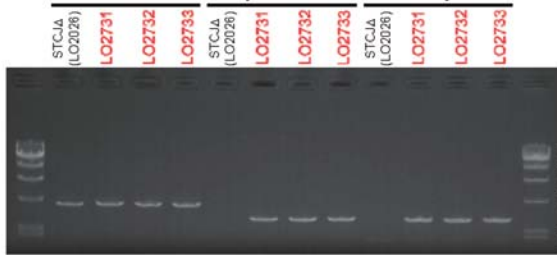

**AN10021.4 (*mdpA*)**

wt = 3,833 bp    wt = no band    wt = no band  
 ko = 4,004 bp    ko = 2,923 bp    ko = 2,966 bp

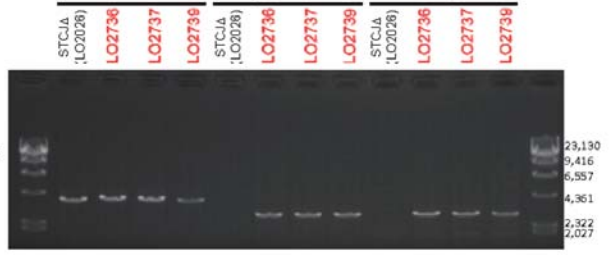

**AN10049.4 (*mdpB*)**

wt = 3,042 bp    wt = no band    wt = no band  
 ko = 4,050 bp    ko = 2,960 bp    ko = 2,975 bp

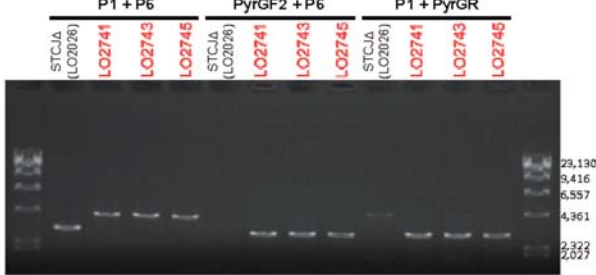

**AN0146.4 (*mdpC*)**

wt = 3,119 bp    wt = no band    wt = no band  
 ko = 3,961 bp    ko = 2,939 bp    ko = 2,907 bp

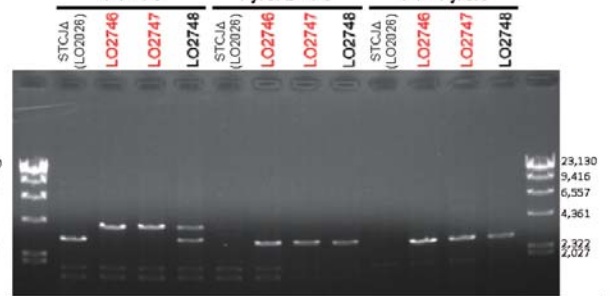

**AN0147.4 (*mdpD*)**

|               |               |               |
|---------------|---------------|---------------|
| wt = 3,928 bp | wt = no band  | wt = no band  |
| ko = 4,069 bp | ko = 2,974 bp | ko = 2,980 bp |
| P1 + P6       | PyrGF2 + P6   | P1 + PyrGR    |

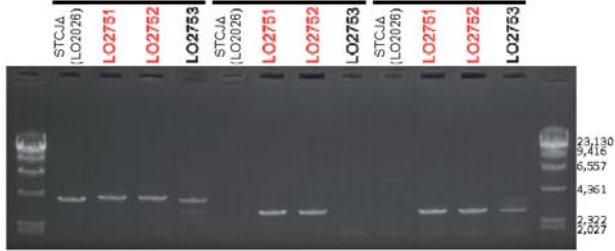

**AN0148.4 (*mdpE*)**

|               |               |               |
|---------------|---------------|---------------|
| wt = 3,425 bp | wt = no band  | wt = no band  |
| ko = 3,884 bp | ko = 2,889 bp | ko = 2,880 bp |
| P1 + P6       | PyrGF2 + P6   | P1 + PyrGR    |

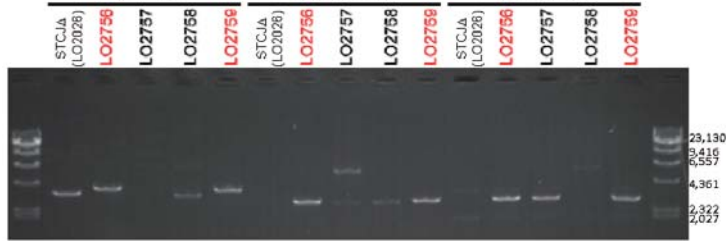

**AN0149.4 (*mdpF*)**

|               |               |               |
|---------------|---------------|---------------|
| wt = 3,133 bp | wt = no band  | wt = no band  |
| ko = 3,960 bp | ko = 2,938 bp | ko = 2,907 bp |
| P1 + P6       | PyrGF2 + P6   | P1 + PyrGR    |

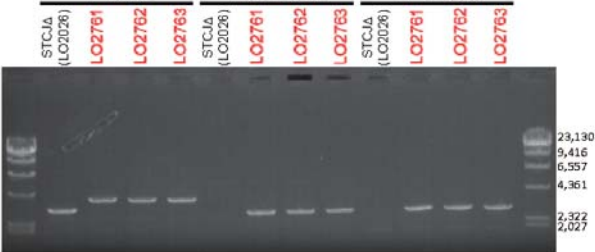

**AN10022.4 (*mdpH*)**

|               |               |               |
|---------------|---------------|---------------|
| wt = 3,933 bp | wt = no band  | wt = no band  |
| ko = 4,086 bp | ko = 2,961 bp | ko = 3,010 bp |
| P1 + P6       | PyrGF2 + P6   | P1 + PyrGR    |

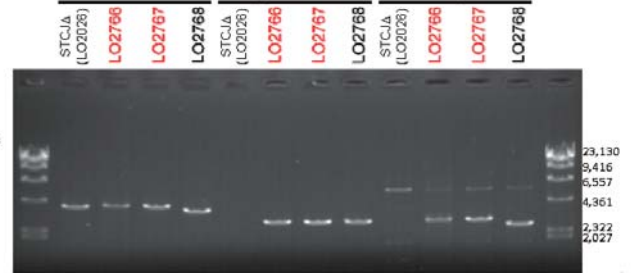

**AN10035.4 (*mdpI*)**

|               |               |               |
|---------------|---------------|---------------|
| wt = 4,232 bp | wt = no band  | wt = no band  |
| ko = 4,126 bp | ko = 3,068 bp | ko = 2,943 bp |
| P1 + P6       | PyrGF2 + P6   | P1 + PyrGR    |

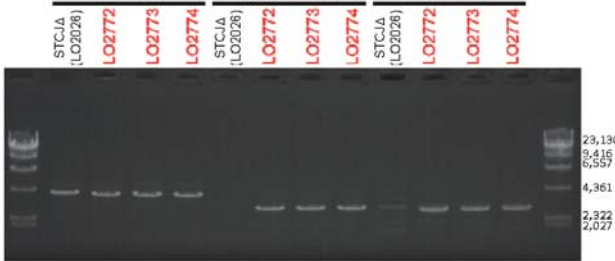

**AN10038.4 (*mdpJ*)**

|               |               |               |
|---------------|---------------|---------------|
| wt = 3,090 bp | wt = no band  | wt = no band  |
| ko = 3,995 bp | ko = 2,918 bp | ko = 2,962 bp |
| P1 + P6       | PyrGF2 + P6   | P1 + PyrGR    |

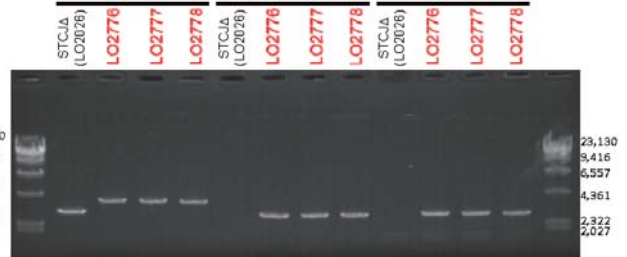



### AN10044.4 (*mdpK*)

wt = 3,091 bp    wt = no band    wt = no band  
ko = 3,963 bp    ko = 2,967 bp    ko = 2,881 bp

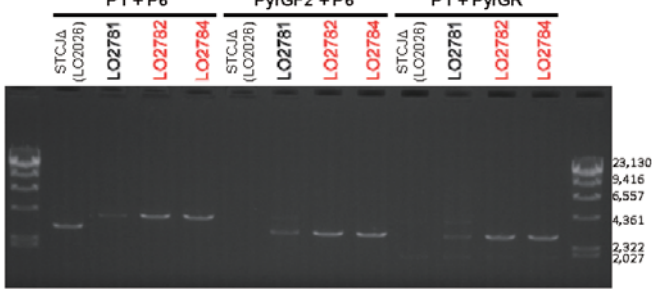

### AN10023.4 (*mdpL*)

wt = 3,452 bp    wt = no band    wt = no band  
ko = 3,933 bp    ko = 2,869 bp    ko = 2,949 bp

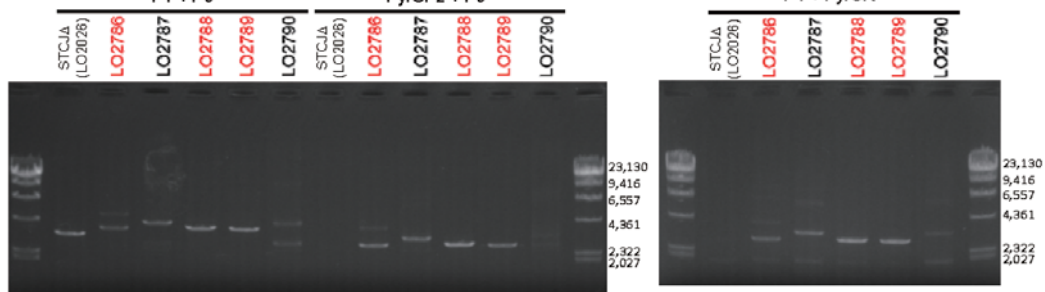

### *alcA*\_AN10021.4 (*alcA\_mdpA*)

wt = 2,215 bp    wt = no band    wt = no band  
*alcA* = 4,621 bp    *alcA* = 3,540 bp    *alcA* = 3,169 bp

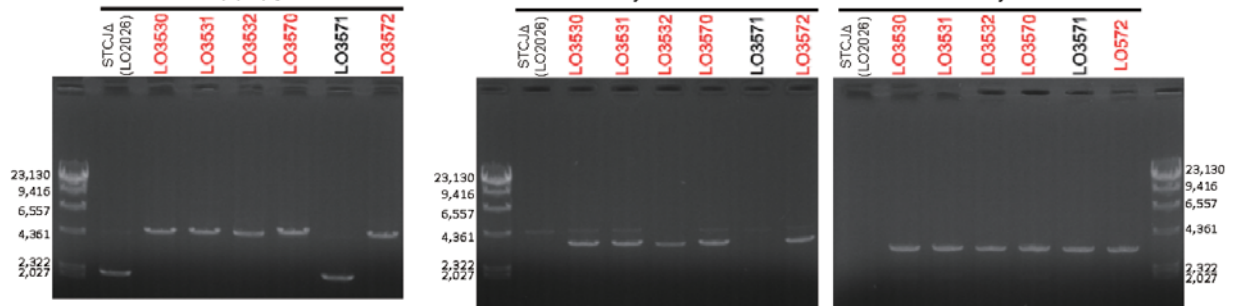

**Figure S2.** Diagnostic PCR strategy and results. We used two redundant strategies to determine if the target gene had been deleted by replacement with *Afp<sub>pyrG</sub>*. In one strategy, DNA from transformants is amplified with two primers, P1 from the chromosomal region just outside of the 5' flank of the transforming DNA fragment and P6 from just outside of the 3' flank. If the target gene is different in size from the *Afp<sub>pyrG</sub>* gene which was used as a selectable

marker for transformation, the PCR fragment amplified from a correct transformant (b) will be different in size from the fragment amplified if the target gene is intact (a). In some instances the target gene and the *AfpyrG* cassette will be almost the same size and this strategy will not produce definitive results. In the second strategy, P1 and P6 are used with primers specific to the *AfpyrG* cassettes. For example, if the target gene has been replaced by the *AfpyrG* gene (d), P1 and AfpyrGR will amplify a fragment of a predictable size. If the target gene has not been replaced (c), the AfpyrGR primer will not anneal and there will be no specific amplification. Likewise AfpyrGF2 and P6 are used in combination and amplification will only occur if the target gene has been replaced by *AfpyrG*. For promoter replacements of *mdpA*, *AfpyroA* was used as a selectable marker. For ease of creating fusion PCR constructs, the *AfpyroA* cassette had been constructed such that it contained AfpyrGF2 and AfpyrGR sequences that allowed verification with the same strategies as for constructs using *AfpyrG* as a selectable marker. We additionally verified the *mdpA* promoter replacements with *AfpyroA*-specific primers (data not shown). (e) Results of diagnostic PCR for *mdp* cluster deletions. Strain numbers labeled in red are correct transformants.

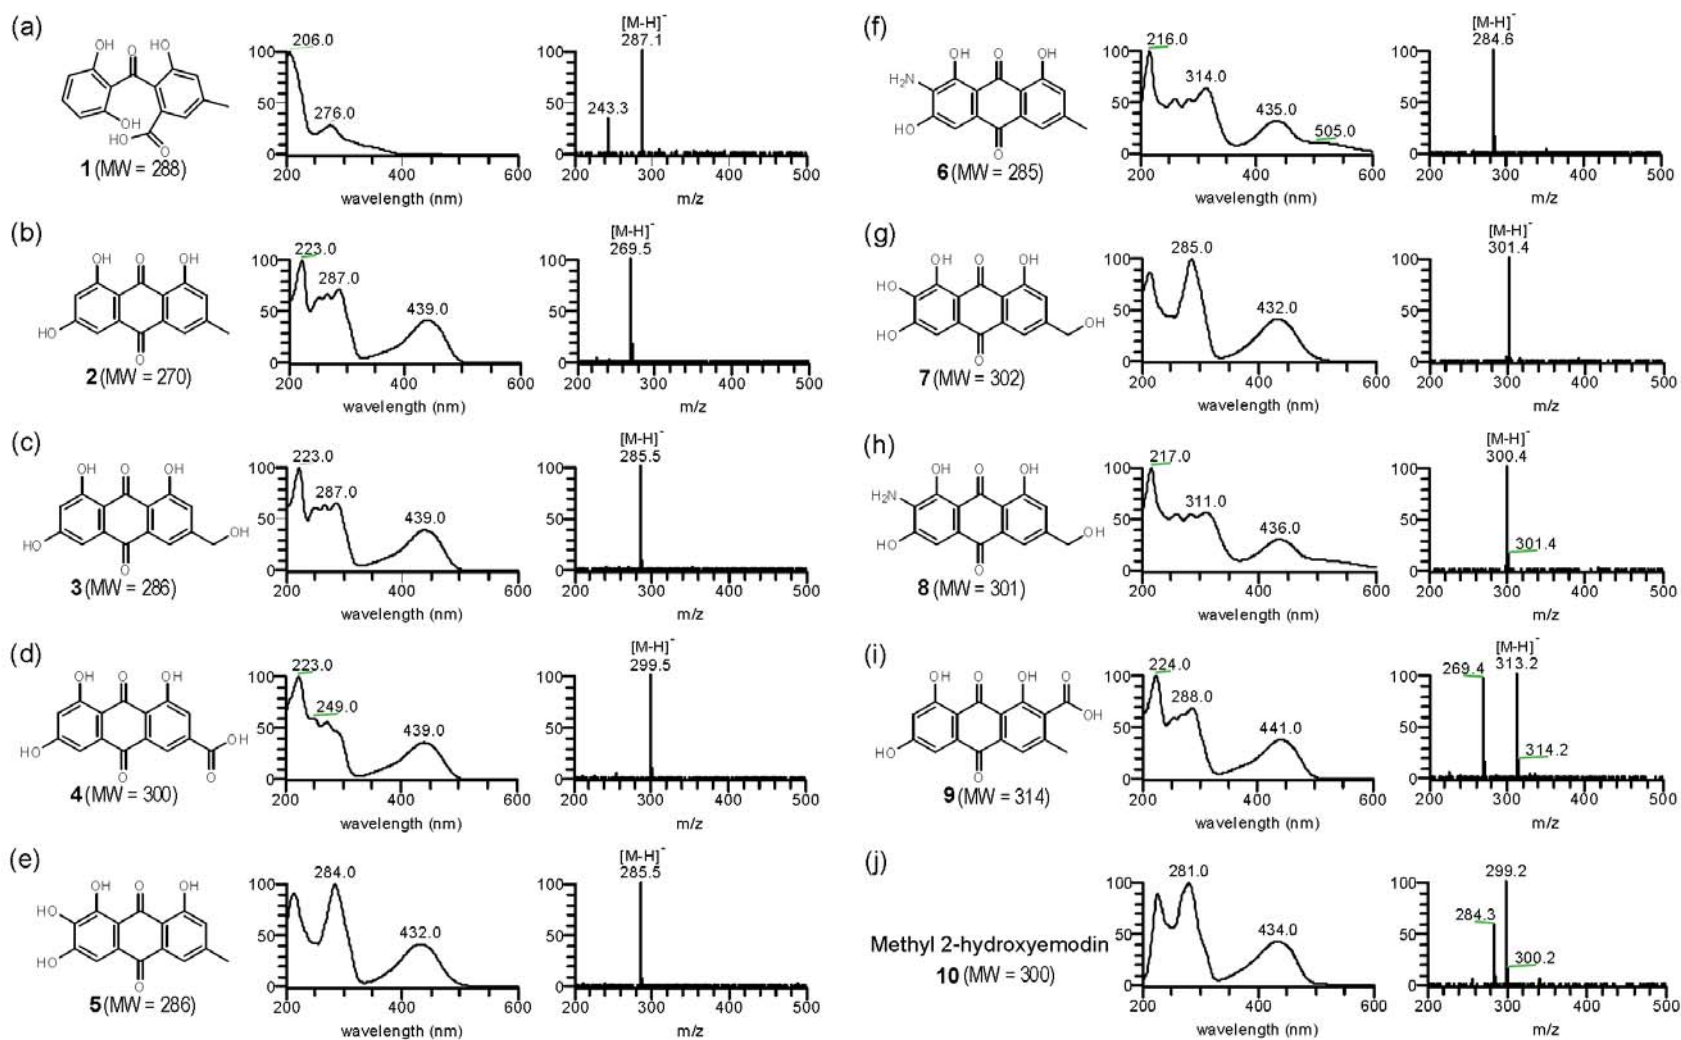

**Figure S3.** UV-Vis and ESIMS spectra in negative mode of monodictyphenone (1), emodin (2), and emodin derivatives (3 – 10).

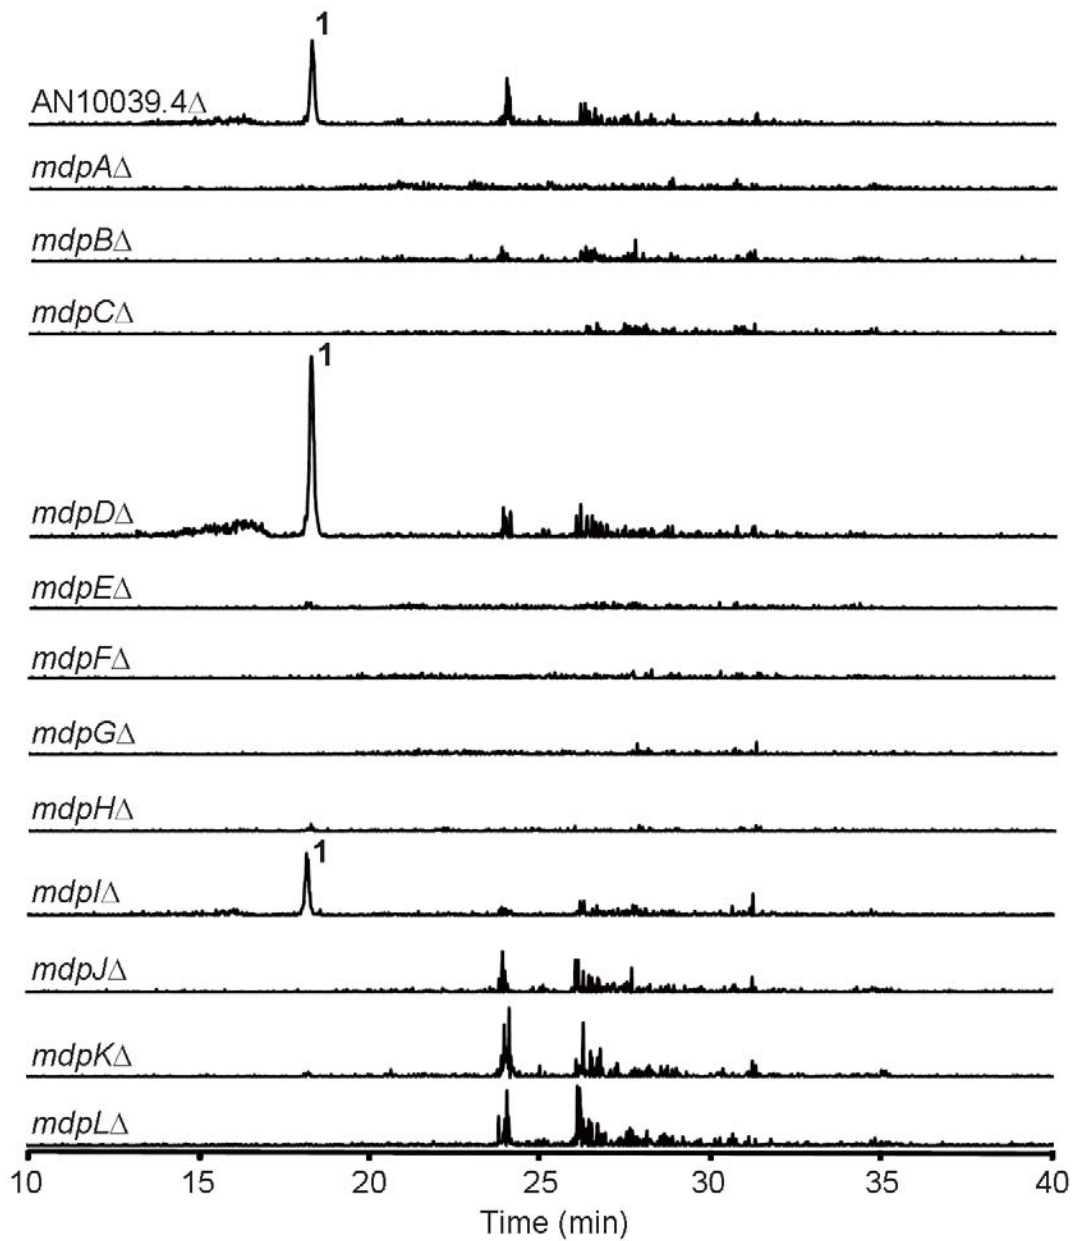

**Figure S4.** Analysis of the effects on monodictyphenone (**1**) production of gene deletions in the *mdp* cluster by negative mode extracted ion chromatograms (EIC) at  $m/z$  287. All strains have *nku* $\Delta$ , *stcJ* $\Delta$ , and *cclA* $\Delta$  background as in Figure 3. The Y axis of each profile was at the same order of magnitude.

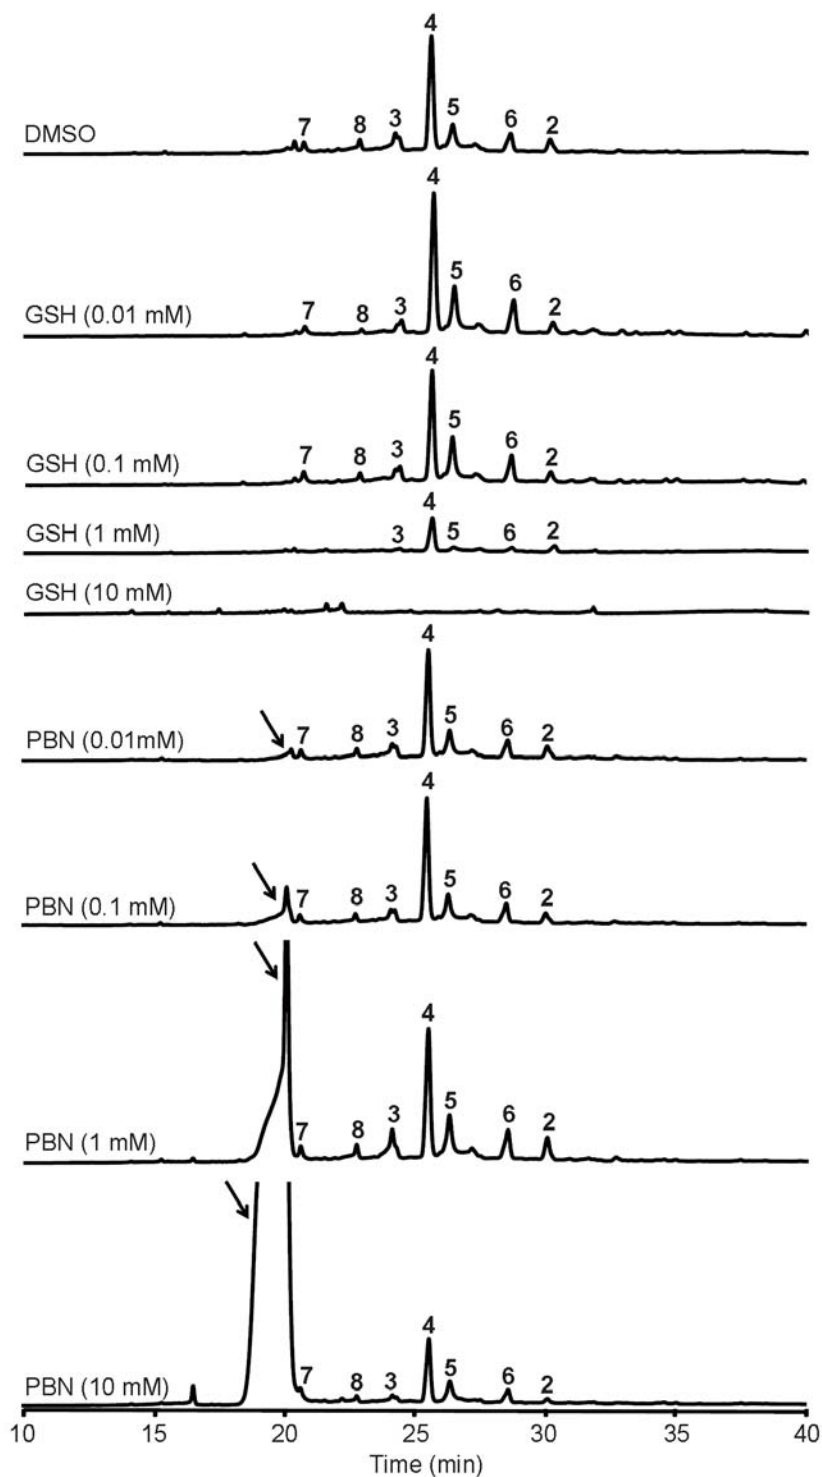

**Figure S5.** Metabolite profiles of *A. nidulans* strain LO2051 (*nkuA* $\Delta$ , *stcJ* $\Delta$ , *cclA* $\Delta$ ) incubated with vehicle control (0.5% DMSO), and various concentration of glutathione (GSH) and *N*-tert-butyl- $\alpha$ -phenylnitron (PBN) at UV 276 nm. The arrow indicated the location of PBN. The Y axis of each profile was at the same order of magnitude.

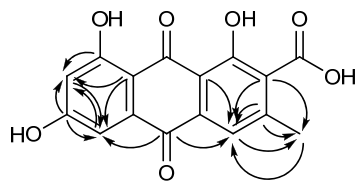

**Figure S6.** HMBC correlations of endocrocin (**9**).

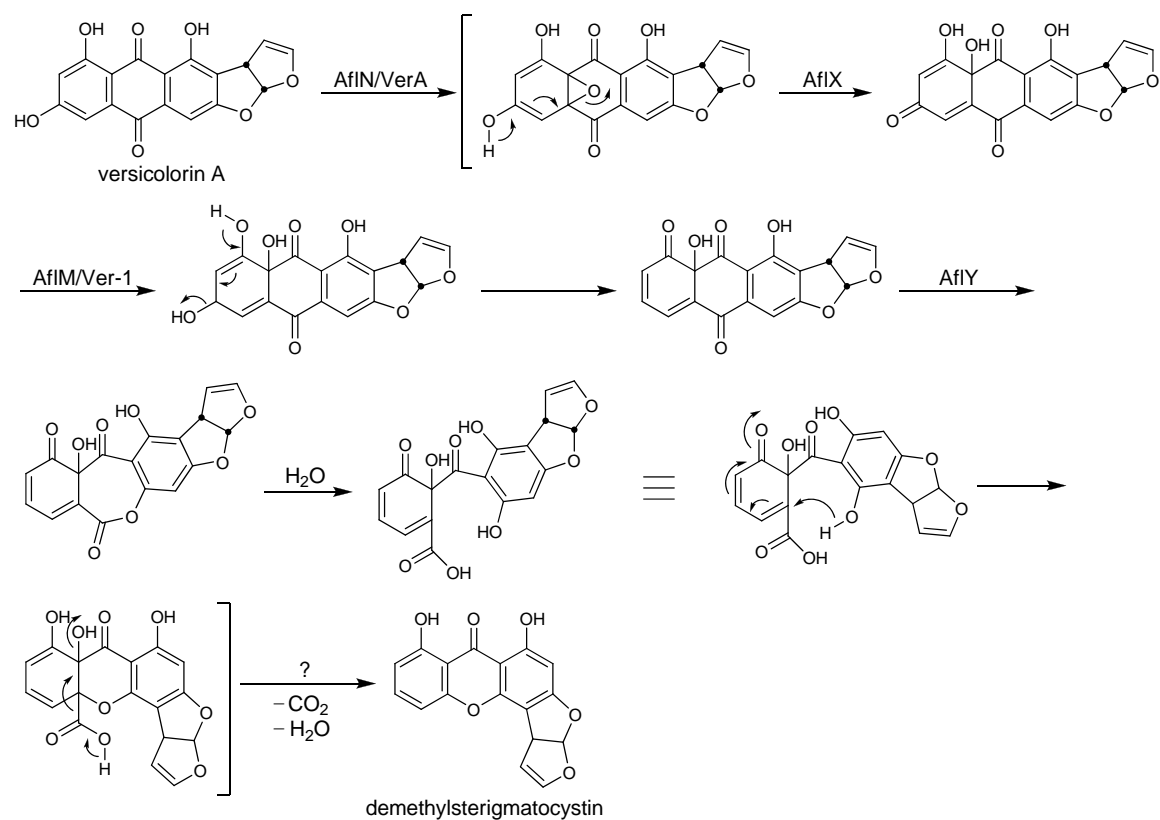

**Figure S7.** Possible pathway for conversion of versicolorin A to demethylsterigmatocystin.

20090616H\_L02766\_F1  
Automation directory:  
Pulse Sequence: s2pu1  
Solvent: dms0  
Temp: 6.0 C / 273.1 K  
Operator: wang  
File: 20090616H\_L02766\_F1  
Mercury-400BB "MVX"  
Relax. delay 1.000 sec  
Pulse 45.0 degrees  
Acq. time 1.998 sec  
Width 6402.0 Hz  
32 repetitions  
OBSERVE H1, 400.1010535 MHz  
DATA PROCESSING  
FT size 32768  
Total time 1 min, 50 sec

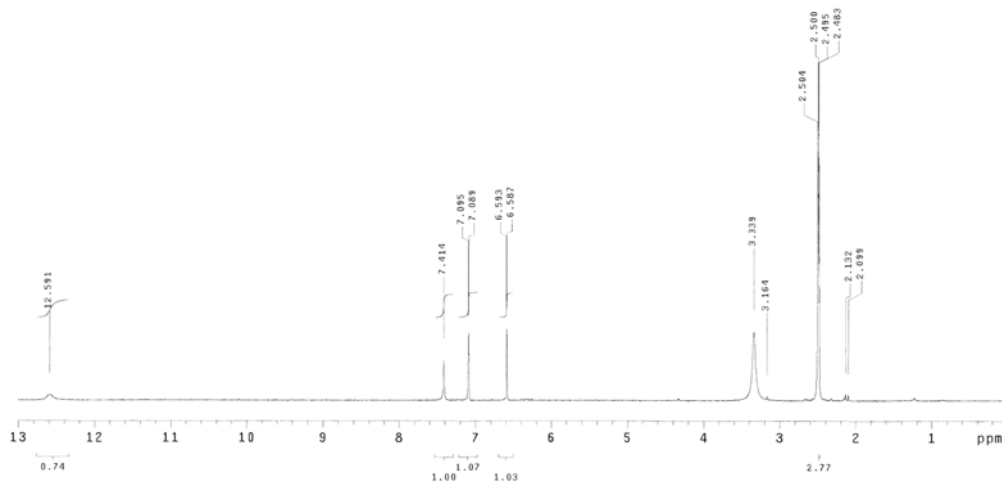

**Figure S8.**  $^1\text{H}$  NMR spectrum of endrococin (**9**) in  $\text{DMSO-}d_6$ .

20090620C\_L02766\_F1  
Automation directory:  
Pulse Sequence: s2pu1  
Solvent: dms0  
Temp: 6.0 C / 273.1 K  
Operator: wang  
Mercury-400BB "MVX"  
Relax. delay 2.000 sec  
Pulse 45.0 degrees  
Acq. time 1.300 sec  
Width 24154.6 Hz  
7776 repetitions  
OBSERVE C13, 100.6055153 MHz  
DECOUPLE H1, 400.1030315 MHz  
Power 36 dB  
continuously on  
WALTZ-16 modulated  
DATA PROCESSING  
Line broadening 0.5 Hz  
FT size 65536  
Total time 119 hr, 49 min, 43 sec

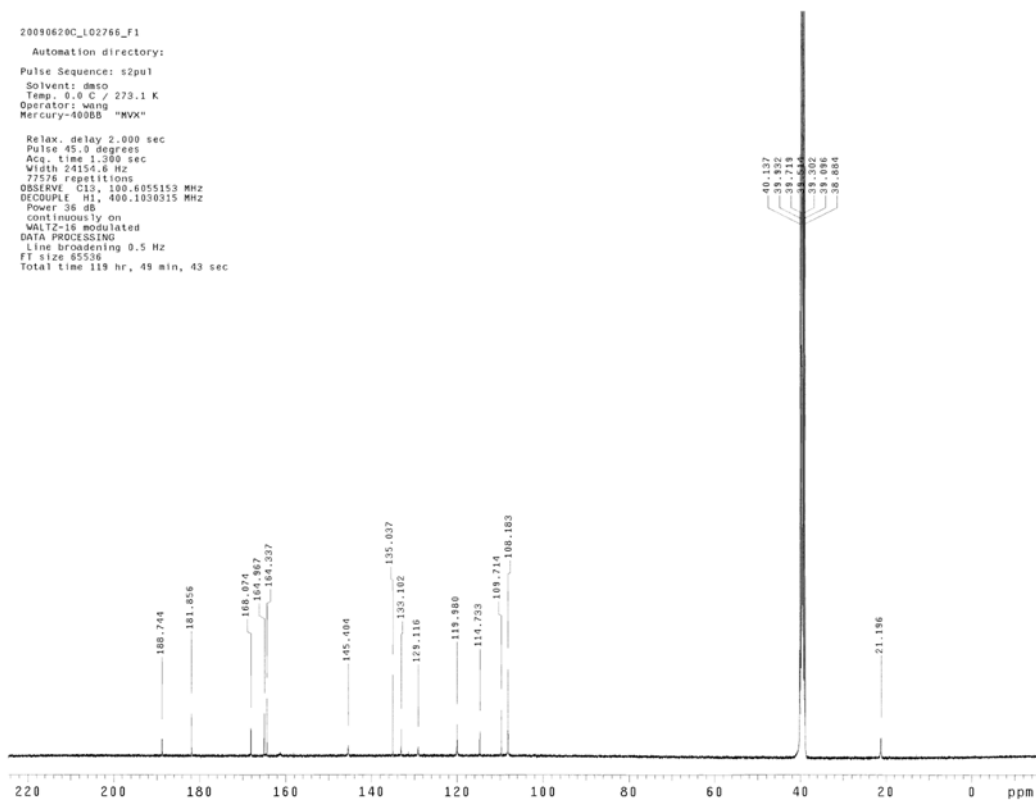

**Figure S9.**  $^{13}\text{C}$  NMR spectrum of endrococin (**9**) in  $\text{DMSO-}d_6$ .



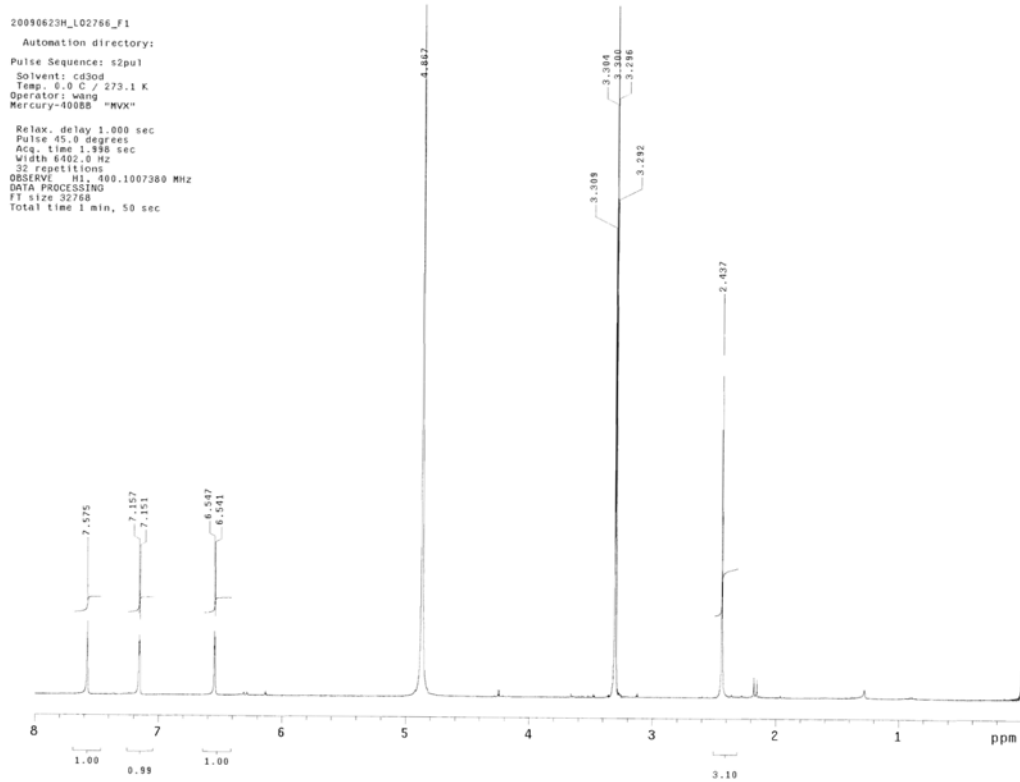

**Figure S10.**  $^1\text{H}$  NMR spectrum of endocrocin (**9**) in  $\text{CD}_3\text{OD}$ .

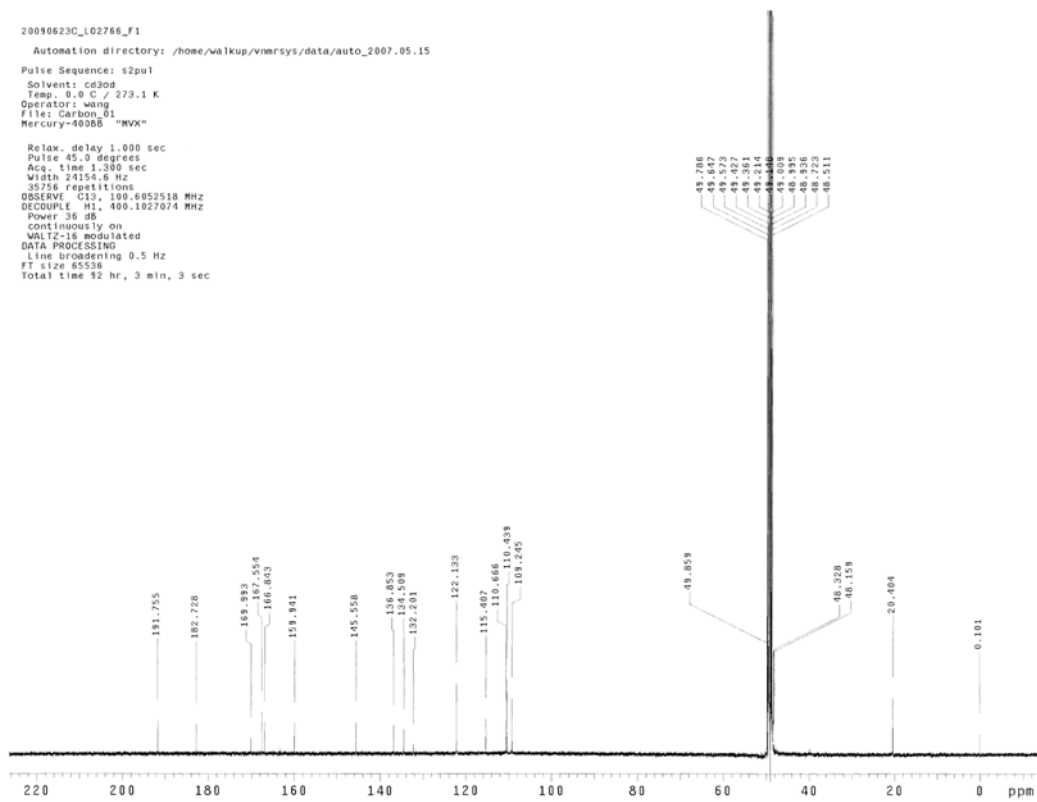

**Figure S11.**  $^{13}\text{C}$  NMR spectrum of endocrocin (**9**) in  $\text{CD}_3\text{OD}$ .
